# Supplementary material for: Predicting the risk of stroke among patients with type 2 diabetes: a systematic review and meta-analysis of C-statistics
Source: PubMed Central journal article supplement — BMJ Open. 2019 Aug 30;9(8):e025579. doi: 10.1136/bmjopen-2018-025579 (PMC6719765; doi:10.1136/bmjopen-2018-025579), 2019-08-30
Supplement: bmjopen-2018-025579supp001.pdf [file bmjopen-2018-025579supp001.pdf]

## SUPPLEMENTAL MATERIAL

## Supplementary Table.

Table S1: Search strategy used in different databases

| MEDLINE                                                                                               |                                                                                                                                                                           |
|-------------------------------------------------------------------------------------------------------|---------------------------------------------------------------------------------------------------------------------------------------------------------------------------|
| 1. cardiovascular risk score.mp                                                                       | 34. risk engine.mp                                                                                                                                                        |
| 2. CVD risk score.mp                                                                                  | 35. risk calculator.mp                                                                                                                                                    |
| 3. coronary disease risk score.mp                                                                     | 36. risk score.mp                                                                                                                                                         |
| 4. heart disease risk score.mp                                                                        | 37. prediction tool*.mp                                                                                                                                                   |
| 5. CVD risk assessment.mp                                                                             | 38. prediction rule*.mp                                                                                                                                                   |
| 6. coronary risk assessment.mp                                                                        | 39. risk model*.mp                                                                                                                                                        |
| 7. stroke risk score                                                                                  | 40. prognostic tool*.mp                                                                                                                                                   |
| 8. 1 or 2 or 3 or 4 or 5 or 6 or 7                                                                    | 41. prognostic model*.mp                                                                                                                                                  |
| 9. Framingham risk score.mp                                                                           | 42. exp Risk Assessment/cl, mt, st, sn, sd, td,<br>ut [Classification, Methods, Standards,<br>Statistics & Numerical Data, Supply &<br>Distribution, Trends, Utilization] |
| 10. Framingham equation.mp                                                                            | 43. risk algorithm.mp                                                                                                                                                     |
| 11. Framingham model.mp                                                                               | 44. prediction algorithm.mp                                                                                                                                               |
| 12. SCORE.mp                                                                                          | 45. 26 or 27 or 28 or 29 or 30 or 31 or 32 or<br>33 or 34 or 35 or 36 or 37 or 38 or 39 or<br>40 or 41 or 42 or 43 or 44                                                  |
| 13. QRISK.mp                                                                                          | 46. validation.mp. or exp Validation Studies/                                                                                                                             |
| 14. PROCAM.mp                                                                                         | 47. validate*.mp                                                                                                                                                          |
| 15. DECODE.mp                                                                                         | 48. 46 or 47                                                                                                                                                              |
| 16. UKPDS.mp                                                                                          | 49. 8 or 25 or 45 or 48                                                                                                                                                   |
| 17. Reynolds risk.mp                                                                                  | 50. diabetes.mp                                                                                                                                                           |
| 18. Dundee risk.mp                                                                                    | 51. type 2 diabetes.mp                                                                                                                                                    |
| 19. BRHS score.mp                                                                                     | 52. exp Diabetes Mellitus, Type 2/                                                                                                                                        |
| 20. Copenhagen risk.mp                                                                                | 53. exp Diabetic Angiopathies/                                                                                                                                            |
| 21. British Regional Heart Study.mp                                                                   | 54. diabetes mellitus/ or diabetes<br>complications/                                                                                                                      |
| 22. Swedish National Diabetes Register.mp                                                             | 55. 50 or 51 or 52 or 53 or 54                                                                                                                                            |
| 23. New Zealand chart.mp                                                                              | 56. CVD.mp                                                                                                                                                                |
| 24. ASSIGN score.mp                                                                                   | 57. exp Coronary Artery Disease/                                                                                                                                          |
| 25. 9 or 10 or 11 or 12 or 13 or 14 or 15 or 16<br>or 17 or 18 or 19 or 20 or 21 or 22 or 23<br>or 24 | 58. CAD.mp                                                                                                                                                                |
| 26. prediction model.mp                                                                               | 59. coronary heart disease.mp. or exp<br>Coronary Disease/                                                                                                                |
| 27. risk function.mp                                                                                  | 60. CHD.mp                                                                                                                                                                |
| 28. risk prediction.mp                                                                                | 61. exp Heart Failure/                                                                                                                                                    |
| 29. risk table.mp                                                                                     | 62. exp Stroke/                                                                                                                                                           |
| 30. predictive model*.mp                                                                              | 63. Cardiovascular Diseases/                                                                                                                                              |
| 31. exp "Predictive Value of Tests"/                                                                  | 64. 56 or 57 or 58 or 59 or 60 or 61 or 62 or<br>63                                                                                                                       |
| 32. risk chart.mp                                                                                     | 65. 49 AND 55 AND 64                                                                                                                                                      |
| 33. risk equation.mp                                                                                  |                                                                                                                                                                           |

| PubMed                                                                                                                                                                                                                                                                                                                                                                                                                                                                                                                                                                                                                                                                                                                                                                                                                                                                                                                                                                                                                                                                                                                                                                                                                                                                                                                                                                                                                                                                                                                                                                                                                                                                                                                                                                                                                                                                                                                                                                                                                                                                                                                                                                                                                                                                                                                                                                                                                                                                                                                                                                                                                                                                                                                                                                                                                                                                                                                                                                                                                                                                                                                 |                                                                                                                                                                                                                                                                                                                                                                                                                                                                                                             |
|------------------------------------------------------------------------------------------------------------------------------------------------------------------------------------------------------------------------------------------------------------------------------------------------------------------------------------------------------------------------------------------------------------------------------------------------------------------------------------------------------------------------------------------------------------------------------------------------------------------------------------------------------------------------------------------------------------------------------------------------------------------------------------------------------------------------------------------------------------------------------------------------------------------------------------------------------------------------------------------------------------------------------------------------------------------------------------------------------------------------------------------------------------------------------------------------------------------------------------------------------------------------------------------------------------------------------------------------------------------------------------------------------------------------------------------------------------------------------------------------------------------------------------------------------------------------------------------------------------------------------------------------------------------------------------------------------------------------------------------------------------------------------------------------------------------------------------------------------------------------------------------------------------------------------------------------------------------------------------------------------------------------------------------------------------------------------------------------------------------------------------------------------------------------------------------------------------------------------------------------------------------------------------------------------------------------------------------------------------------------------------------------------------------------------------------------------------------------------------------------------------------------------------------------------------------------------------------------------------------------------------------------------------------------------------------------------------------------------------------------------------------------------------------------------------------------------------------------------------------------------------------------------------------------------------------------------------------------------------------------------------------------------------------------------------------------------------------------------------------------|-------------------------------------------------------------------------------------------------------------------------------------------------------------------------------------------------------------------------------------------------------------------------------------------------------------------------------------------------------------------------------------------------------------------------------------------------------------------------------------------------------------|
| <p>(((((("diabetes mellitus"[MeSH Terms] OR "diabetes insipidus"[MeSH Terms]) OR "diabetes mellitus"[MeSH Terms]) OR "diabetes mellitus, type 2"[MeSH Terms]) OR "diabetic angiopathies"[MeSH Terms]) AND (((((((("cardiovascular diseases"[MeSH Terms] OR CVD[Text Word]) OR "coronary artery disease"[MeSH Terms]) OR CAD[Text Word]) OR "coronary disease"[MeSH Terms]) OR CHD[Text Word]) OR "heart failure"[MeSH Terms]) OR "stroke"[MeSH Terms])) AND (((((((((((((((prediction model[Text Word] OR "risk assessment"[MeSH Terms]) OR ("risk"[MeSH Terms] OR "risk"[All Fields]) AND "physiology"[MeSH Terms])) OR risk prediction[Text Word]) OR risk table[Text Word]) OR ("risk"[MeSH Terms] OR "risk"[All Fields]) AND "algorithms"[MeSH Terms])) OR (predictive model[Text Word] OR predictive modeling[Text Word] OR predictive modelling[Text Word] OR predictive models[Text Word])) OR "predictive value of tests"[MeSH Terms]) OR risk chart[Text Word]) OR risk equation[Text Word]) OR risk engine[Text Word]) OR risk calculator[Text Word]) OR risk score[Text Word]) OR (prediction tool[Text Word] OR prediction tools[Text Word]) OR (prediction rule[Text Word] OR prediction rules[Text Word])) OR (risk model[Text Word] OR risk modeled[Text Word] OR risk modeling[Text Word] OR risk modelling[Text Word] OR risk models[Text Word])) OR (prediction[All Fields] AND "algorithms"[MeSH Terms])) OR (prognostic tool[Text Word] OR prognostic tools[Text Word])) OR (prognostic model[Text Word] OR prognostic modeling[Text Word] OR prognostic modelling[Text Word] OR prognostic models[Text Word])) OR (((cardiovascular risk score[Text Word] OR CVD risk score[Text Word]) OR ("heart"[MeSH Terms] OR "heart"[All Fields] OR "coronary"[All Fields]) AND disease risk score[Text Word])) OR heart disease risk score[Text Word]) OR CVD risk assessment[Text Word]) OR coronary risk assessment[Text Word])) OR (((((((((((Framingham risk score[Text Word] OR Framingham equation[Text Word]) OR Framingham model[Text Word]) OR SCORE risk charts[Text Word]) OR QRISK[Text Word]) OR PROCAM[Text Word]) OR DECODE[Text Word]) OR UKPDS[Text Word]) OR (Reynolds[All Fields] AND risk[Text Word])) OR (Dundee[All Fields] AND risk[Text Word])) OR BRHS score[Text Word]) OR (Copenhagen[All Fields] AND risk[Text Word])) OR British Regional Heart Study[Text Word]) OR Swedish National Diabetes Register[Text Word]) OR (("new zealand"[MeSH Terms] OR ("new"[All Fields] AND "zealand"[All Fields]) OR "new zealand"[All Fields]) AND chart[Text Word])) OR ASSIGN score[Text Word])) OR ((validation[Text Word] OR validation studies[Text Word]) OR (validate[Text Word] OR validate'[Text Word] OR validate29[Text Word] OR validated[Text Word] OR validated'[Text Word] OR validated12[Text Word] OR validatedcaffeine[Text Word] OR validatedfor[Text Word] OR validatedfurther[Text Word] OR validatedin[Text Word] OR validatedsanitization[Text Word] OR validates[Text Word] OR validates'[Text Word] OR validatethe[Text Word] OR validatethese[Text Word]))))</p> |                                                                                                                                                                                                                                                                                                                                                                                                                                                                                                             |
| EMBASE                                                                                                                                                                                                                                                                                                                                                                                                                                                                                                                                                                                                                                                                                                                                                                                                                                                                                                                                                                                                                                                                                                                                                                                                                                                                                                                                                                                                                                                                                                                                                                                                                                                                                                                                                                                                                                                                                                                                                                                                                                                                                                                                                                                                                                                                                                                                                                                                                                                                                                                                                                                                                                                                                                                                                                                                                                                                                                                                                                                                                                                                                                                 |                                                                                                                                                                                                                                                                                                                                                                                                                                                                                                             |
| <ol style="list-style-type: none"> <li>1. exp diabetes mellitus/co, cn, di, dm, ep, et, pc, si [Complication, Congenital Disorder, Diagnosis, Disease Management, Epidemiology, Etiology, Prevention, Side Effect]</li> <li>2. non insulin dependent diabetes mellitus/co, cn, di, dm, ep, et, pc, si [Complication, Congenital Disorder, Diagnosis, Disease Management, Epidemiology, Etiology, Prevention, Side Effect]</li> <li>3. diabetes mellitus, type 2.mp.</li> <li>4. exp diabetic angiopathy/co, cn, di, dm, ep, et, pc, si [Complication, Congenital</li> </ol>                                                                                                                                                                                                                                                                                                                                                                                                                                                                                                                                                                                                                                                                                                                                                                                                                                                                                                                                                                                                                                                                                                                                                                                                                                                                                                                                                                                                                                                                                                                                                                                                                                                                                                                                                                                                                                                                                                                                                                                                                                                                                                                                                                                                                                                                                                                                                                                                                                                                                                                                            | <ol style="list-style-type: none"> <li>38. exp coronary risk/</li> <li>39. stroke risk score.mp</li> <li>40. 31 or 32 or 33 or 34 or 35 or 36 or 37 or 38 or 39</li> <li>41. exp validation study/ or validation.mp.</li> <li>42. validate*.mp.</li> <li>43. 41 or 42</li> <li>44. exp Framingham risk score/</li> <li>45. Framingham equation.mp.</li> <li>46. Framingham model.mp.</li> <li>47. SCORE.mp.</li> <li>48. exp QRISK score/</li> <li>49. exp PROCAM score/</li> <li>50. DECODE.mp.</li> </ol> |

|                                                                                                                                                                                                                                                                                                                                                                                                                                                                                                                                                                                                                                                                                                                                                                                                                                                                                                                                                                                                                                                                                                                                                                                                                                                                                          |                                                                                                                                                                                                                                                                                                                                                                                                                                                                                                                                                                                                                                                                                                                                                                                                                                                                                                                                                                                                                                                                                                                                                                                                                                                                                                                                                                                                                                                                                                                                                                                                                  |
|------------------------------------------------------------------------------------------------------------------------------------------------------------------------------------------------------------------------------------------------------------------------------------------------------------------------------------------------------------------------------------------------------------------------------------------------------------------------------------------------------------------------------------------------------------------------------------------------------------------------------------------------------------------------------------------------------------------------------------------------------------------------------------------------------------------------------------------------------------------------------------------------------------------------------------------------------------------------------------------------------------------------------------------------------------------------------------------------------------------------------------------------------------------------------------------------------------------------------------------------------------------------------------------|------------------------------------------------------------------------------------------------------------------------------------------------------------------------------------------------------------------------------------------------------------------------------------------------------------------------------------------------------------------------------------------------------------------------------------------------------------------------------------------------------------------------------------------------------------------------------------------------------------------------------------------------------------------------------------------------------------------------------------------------------------------------------------------------------------------------------------------------------------------------------------------------------------------------------------------------------------------------------------------------------------------------------------------------------------------------------------------------------------------------------------------------------------------------------------------------------------------------------------------------------------------------------------------------------------------------------------------------------------------------------------------------------------------------------------------------------------------------------------------------------------------------------------------------------------------------------------------------------------------|
| <p>Disorder, Diagnosis, Disease Management, Epidemiology, Etiology, Prevention, Side Effect]</p> <ol style="list-style-type: none"> <li>5. 1 or 2 or 3 or 4</li> <li>6. exp prediction/</li> <li>7. exp model/</li> <li>8. 6 and 7</li> <li>9. exp risk assessment/</li> <li>10. risk function.mp.</li> <li>11. exp risk/</li> <li>12. 6 and 11</li> <li>13. risk table.mp.</li> <li>14. exp algorithm/</li> <li>15. 11 and 14</li> <li>16. predictive model.mp.</li> <li>17. exp predictive value/</li> <li>18. risk chart.mp.</li> <li>19. risk equation.mp.</li> <li>20. risk engine.mp.</li> <li>21. risk calculator.mp.</li> <li>22. risk score.mp.</li> <li>23. prediction tool*.mp.</li> <li>24. prediction rule*.mp.</li> <li>25. 7 and 11</li> <li>26. 6 and 14</li> <li>27. prognostic tool*.mp.</li> <li>28. exp prognosis/</li> <li>29. 7 and 28</li> <li>30. 8 or 9 or 10 or 12 or 13 or 15 or 16 or 17 or 18 or 19 or 20 or 21 or 22 or 23 or 24 or 25 or 26 or 27 or 29</li> <li>31. cardiovascular risk score.mp.</li> <li>32. CVD risk score.mp.</li> <li>33. exp cardiovascular risk/</li> <li>34. coronary disease risk score.mp.</li> <li>35. heart disease risk score.mp.</li> <li>36. CVD risk assessment.mp.</li> <li>37. coronary risk assessment.mp.</li> </ol> | <ol style="list-style-type: none"> <li>51. UKPDS.mp.</li> <li>52. exp Reynolds risk score/</li> <li>53. Dundee risk.mp.</li> <li>54. BRHS score.mp.</li> <li>55. Copenhagen risk.mp.</li> <li>56. British Regional Heart Study.mp.</li> <li>57. Swedish National Diabetes Register.mp.</li> <li>58. New Zealand chart.mp.</li> <li>59. ASSIGN score.mp.</li> <li>60. SCORE risk charts.mp.</li> <li>61. 41 or 42 or 43 or 44 or 45 or 46 or 47 or 48 or 49 or 50 or 51 or 52 or 53 or 54 or 55 or 56 or 57 or 58 or 59 or 60</li> <li>62. 30 or 40 or 43 or 61</li> <li>63. CVD.mp.</li> <li>64. exp coronary artery disease/co, cn, di, dm, ep, et, pc, si [Complication, Congenital Disorder, Diagnosis, Disease Management, Epidemiology, Etiology, Prevention, Side Effect]</li> <li>65. CAD.mp.</li> <li>66. exp ischemic heart disease/co, cn, di, dm, ep, et, pc, si [Complication, Congenital Disorder, Diagnosis, Disease Management, Epidemiology, Etiology, Prevention, Side Effect]</li> <li>67. CHD.mp.</li> <li>68. coronary disease.mp.</li> <li>69. exp heart failure/co, cn, di, dm, ep, et, pc, si [Complication, Congenital Disorder, Diagnosis, Disease Management, Epidemiology, Etiology, Prevention, Side Effect]</li> <li>70. exp cerebrovascular accident/co, cn, di, dm, ep, et, pc, si [Complication, Congenital Disorder, Diagnosis, Disease Management, Epidemiology, Etiology, Prevention, Side Effect]</li> <li>71. stroke.mp.</li> <li>72. cardiovascular disease/</li> <li>73. 63 or 64 or 65 or 66 or 67 or 68 or 69 or 70 or 71 or 72</li> <li>74. 5 AND 62 AND 73</li> </ol> |
|------------------------------------------------------------------------------------------------------------------------------------------------------------------------------------------------------------------------------------------------------------------------------------------------------------------------------------------------------------------------------------------------------------------------------------------------------------------------------------------------------------------------------------------------------------------------------------------------------------------------------------------------------------------------------------------------------------------------------------------------------------------------------------------------------------------------------------------------------------------------------------------------------------------------------------------------------------------------------------------------------------------------------------------------------------------------------------------------------------------------------------------------------------------------------------------------------------------------------------------------------------------------------------------|------------------------------------------------------------------------------------------------------------------------------------------------------------------------------------------------------------------------------------------------------------------------------------------------------------------------------------------------------------------------------------------------------------------------------------------------------------------------------------------------------------------------------------------------------------------------------------------------------------------------------------------------------------------------------------------------------------------------------------------------------------------------------------------------------------------------------------------------------------------------------------------------------------------------------------------------------------------------------------------------------------------------------------------------------------------------------------------------------------------------------------------------------------------------------------------------------------------------------------------------------------------------------------------------------------------------------------------------------------------------------------------------------------------------------------------------------------------------------------------------------------------------------------------------------------------------------------------------------------------|

**Supplementary Figure Legends.**

**Figure S1.** Funnel plot for the assessment of publication bias among studies where risk prediction models for stroke were developed in diabetes populations.

**Figure S2.** Funnel plot for the assessment of publication bias among studies where risk prediction models for stroke (as part of a composite cardiovascular disease outcome) were developed in diabetes populations.

**Supplementary Figures.****Figure S1.**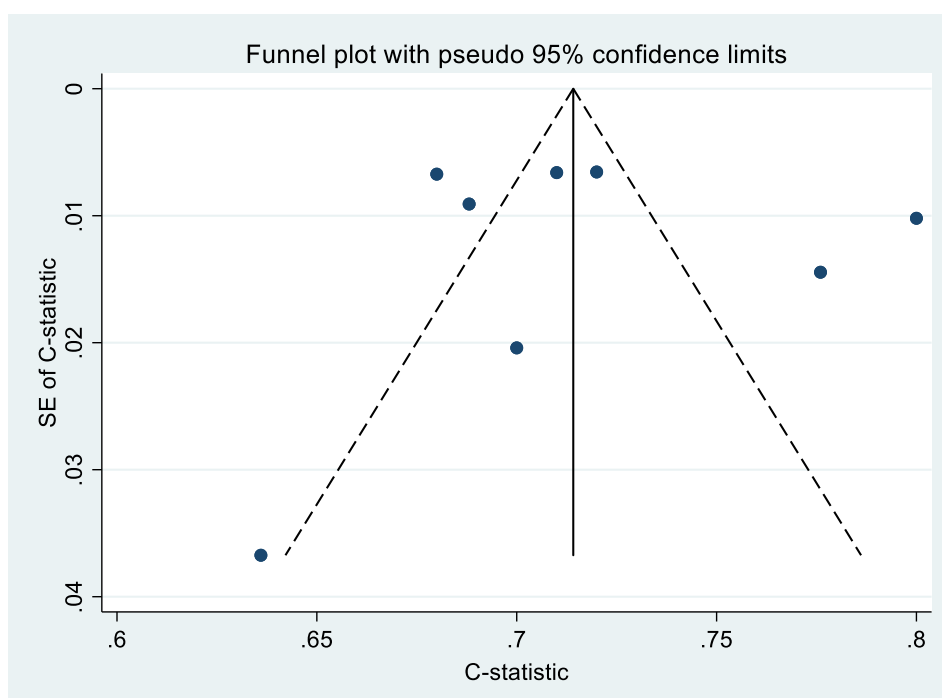

**Figure S1.** Funnel plot for the assessment of publication bias among studies where risk prediction models for stroke were developed in diabetes populations.

**Figure S2.**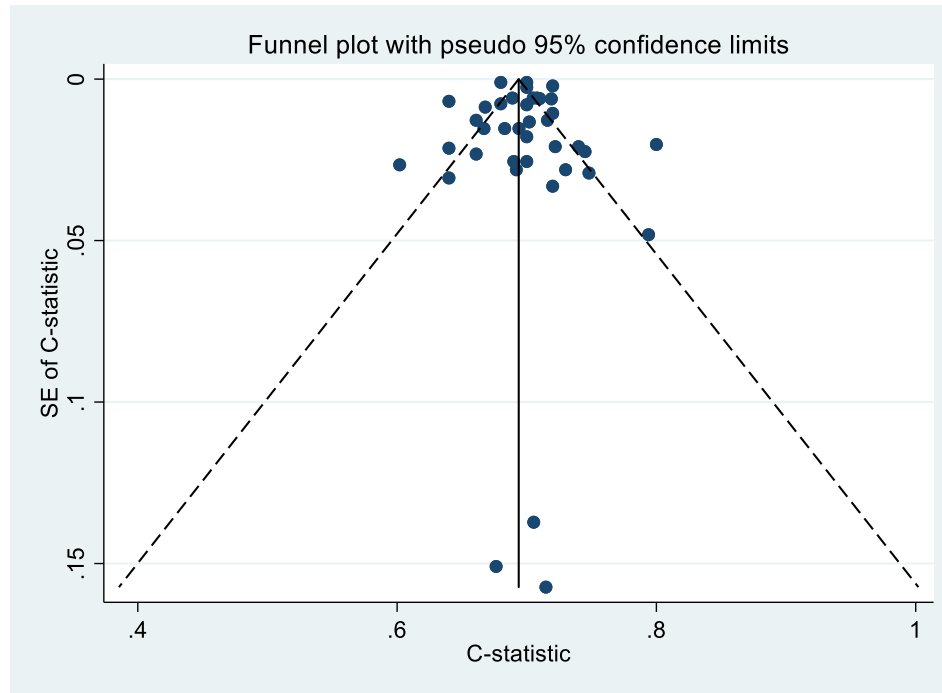

**Figure S2.** Funnel plot for the assessment of publication bias among studies where risk prediction models for stroke (as part of a composite cardiovascular disease outcome) were developed in diabetes populations.
